# Supplementary material for: Outcomes of Citalopram Dosage Risk Mitigation in a Veteran Population
Source: Atypon-hosted journal article supplement (doi:10.1176/appi.ajp.2016.15111444), 2016-05-10
Supplement: appi.ajp.2016.15111444.ds001.pdf [file appi.ajp.2016.15111444.ds001.pdf]

 


Psychiatry Online
