# Supplementary material for: Outcomes of Citalopram Dosage Risk Mitigation in a Veteran Population
Source: Atypon-hosted journal article supplement (doi:10.1176/appi.ajp.2016.15111444), 2016-05-10
Supplement: appi.ajp.2016.15111444.ds001.pdf [file appi.ajp.2016.15111444.ds001.pdf]

**Table S1. Differences in All Baseline Characteristics of Subjects Whose Citalopram Dose Was or Wasn't Reduced to  $\leq$  40 mg/day.**

| Characteristic                                                | Dose Not Reduced<br>n = 17,441 | Dose Decreased<br>n = 18,407 | Standardized Difference (%) <sup>a</sup> |
|---------------------------------------------------------------|--------------------------------|------------------------------|------------------------------------------|
| Age (yrs)                                                     | 58 ± 12                        | 58 ± 11                      | 4.6                                      |
| Male (%)                                                      | 92                             | 92                           | 1.3                                      |
| Race (%)                                                      |                                |                              |                                          |
| White                                                         | 79                             | 79                           | -0.3                                     |
| Black                                                         | 12                             | 12                           | -                                        |
| Other                                                         | 1                              | 1                            | -                                        |
| Missing                                                       | 8                              | 7                            | -                                        |
| Hispanic (%)                                                  |                                |                              |                                          |
| Yes                                                           | 5                              | 5                            | -0.2                                     |
| No                                                            | 90                             | 90                           | -                                        |
| Missing                                                       | 5                              | 5                            | -                                        |
| Married (%)                                                   | 57                             | 57                           | 0.2                                      |
| VA eligibility (%)                                            |                                |                              |                                          |
| Service connected disability > 50%<br>(no prescription copay) | 60                             | 62                           | -                                        |
| Service connected disability < 50%<br>(prescription copay)    | 18                             | 17                           | -                                        |
| Economic Means Test<br>(prescription copay)                   | 22                             | 20                           | -3.5                                     |
| Other insurance (%)                                           | 55                             | 56                           | 2.8                                      |
| <b>VA health care</b>                                         |                                |                              |                                          |
| Hospitalization (%)                                           | 14                             | 15                           | 2.1                                      |
| Days with Outpatient Visit                                    | 14 ± 14                        | 15 ± 15                      | 11.3                                     |
| Prescription classes                                          | 6.1 ± 3.0                      | 6.3 ± 3.1                    | 6.9                                      |
| Electrocardiogram (%)                                         | 23                             | 25                           | 4.7                                      |
| Internal cardiac defibrillator (%)                            | 0.2                            | 0.2                          | 1.3                                      |
| <b>Diagnoses recorded (%)</b>                                 |                                |                              |                                          |
| Depression                                                    | 69                             | 70                           | 1.5                                      |
| Post-traumatic stress disorder                                | 51                             | 54                           | 5.6                                      |
| Suicidal behavior                                             | 0.7                            | 0.8                          | 0.8                                      |
| Anxiety                                                       | 24                             | 26                           | 5.1                                      |
| Psychosis                                                     | 13                             | 16                           | 8.5                                      |
| Substance abuse                                               | 22                             | 22                           | 0.7                                      |
| Sleep disorder                                                | 11                             | 11                           | 0.3                                      |
| Sleep apnea                                                   | 20                             | 19                           | -0.2                                     |
| Tachycardia                                                   | 1.9                            | 1.8                          | -0.3                                     |
| Atrial fibrillation                                           | 3.4                            | 3.4                          | 0.4                                      |
| QT abnormality                                                | 0.03                           | 0.04                         | 0.5                                      |

|                                              |       |      |      |
|----------------------------------------------|-------|------|------|
| Atrioventricular block                       | 2.5   | 2.4  | -0.7 |
| Other arrhythmia                             | 3.6   | 3.7  | 0.1  |
| Hypertension                                 | 58    | 60   | 4.2  |
| Ischemic heart disease                       | 18    | 19   | 2.5  |
| Heart failure                                | 4.4   | 4.4  | -0.1 |
| Cardiac valve abnormality                    | 2.1   | 2.4  | 1.8  |
| Peripheral artery disease                    | 11    | 12   | 3.6  |
| Diabetes mellitus                            | 32    | 32   | -0.7 |
| Pulmonary disease                            | 17    | 17   | 1.9  |
| Chronic kidney disease                       | 5.1   | 5.1  | -0.1 |
| Hypothyroid                                  | 7.0   | 7.8  | 2.8  |
| Liver disease                                | 6.3   | 6.3  | -0.3 |
| Seizure disorder                             | 3.5   | 3.8  | 2.0  |
| Malignant cancer                             | 0.5   | 0.4  | -0.8 |
| Other cancer (excluding basal skin)          | 7.9   | 8.0  | 0.4  |
| <b>Prescriptions (%)</b>                     |       |      |      |
| Other selective serotonin reuptake inhibitor | 50    | 53   | 5.9  |
| Tricyclic antidepressant                     | 7.3   | 7.0  | -1.2 |
| Monoamine oxidase inhibitor                  | 0.006 | 0.01 | 0.6  |
| Sedative/hypnotic                            | 40    | 44   | 7.6  |
| Antipsychotic                                | 24    | 29   | 10.9 |
| Lithium                                      | 1.1   | 1.4  | 2.5  |
| Dementia                                     | 3.1   | 3.3  | 0.9  |
| Beta-adrenergic blocker                      | 34    | 33   | -0.9 |
| Beta-adrenergic stimulant                    | 0.3   | 0.4  | 0.2  |
| Alpha-adrenergic blocker                     | 29    | 29   | -0.1 |
| Angiotensin II antagonist                    | 39    | 39   | 0.7  |
| Calcium channel blocker                      | 21    | 22   | 1.3  |
| Nitrate                                      | 9.6   | 9.9  | 0.9  |
| Digoxin                                      | 1.4   | 1.2  | -1.7 |
| Antiplatelet agent                           | 25    | 27   | 4.8  |
| Anticoagulant                                | 4.9   | 5.0  | 0.6  |
| Other antihypertensive                       | 9.8   | 9.5  | -0.9 |
| Antiarrhythmic                               | 0.8   | 0.8  | -0.1 |
| Diuretic (potassium-sparing)                 | 4.5   | 4.6  | 0.4  |
| Diuretic (other)                             | 27    | 27   | 0.8  |
| Cholesterol reducer                          | 62    | 63   | 2.2  |
| Others that can prolong QT-interval          | 22    | 24   | 3.3  |
| Insulin                                      | 12    | 11   | -2.5 |
| Other glucose control                        | 24    | 24   | -1.0 |
| Thyroid hormone replacement                  | 9.2   | 9.4  | 0.8  |
| Bone loss                                    | 8.6   | 9.0  | 1.4  |
| Corticosteroid (systemic)                    | 8.9   | 9.7  | 2.6  |
| Testosterone replacement                     | 4.3   | 4.4  | 0.5  |
| Anticonvulsant                               | 42    | 44   | 4.4  |
| Migraine medication                          | 3.3   | 2.9  | -2.1 |
| Parkinson's disease                          | 4.0   | 4.0  | 0.1  |
| Nervous system                               | 5.4   | 6.4  | 4.3  |

|                                         |          |          |       |
|-----------------------------------------|----------|----------|-------|
| Muscle relaxant                         | 23       | 24       | 1.0   |
| Respiratory                             | 25       | 26       | 2.4   |
| Nonsteroidal anti-inflammatory          | 38       | 39       | 2.8   |
| Gout                                    | 4.8      | 5.2      | 1.6   |
| Immunosuppressant                       | 1.0      | 0.9      | -0.8  |
| Antineoplastic agent                    | 1.5      | 1.5      | 0.2   |
| Cytochrome 2C19 enzyme inhibitor        | 47       | 48       | 2.1   |
| <b>Citalopram Prescriptions</b>         |          |          |       |
| Days supplied for > 40 mg/day           | 232 ± 99 | 243 ± 98 | 11.9  |
| Last prescribed daily dose (mg)         | 64 ± 8.6 | 63 ± 7.9 | -12.9 |
| Last Month (%)                          |          |          |       |
| May                                     | 12       | 11       | 3.3   |
| June                                    | 29       | 34       | -11.4 |
| July                                    | 59       | 55       | 8.6   |
| Last Days Supply (%)                    |          |          |       |
| ≤ 34                                    | 36       | 43       | -     |
| 35 to 89                                | 7        | 7        | -     |
| 90                                      | 57       | 50       | -13.8 |
| Carryover into follow-up period         |          |          |       |
| Zero (%)                                | 51       | 59       | 16.8  |
| Days , if not zero                      | 28 ± 17  | 29 ± 16  | -     |
| Refill (%)                              | 59       | 61       | 4.0   |
| Mailed (%)                              | 92       | 92       | -0.2  |
| Community-based outpatient clinic       |          |          |       |
|                                         | 41       | 42       | 3.0   |
| Prescriber (%)                          |          |          |       |
| Psychiatry                              | 48       | 53       | 11.3  |
| Physician, not psychiatry               | 30       | 24       | -     |
| Physician extender <sup>b</sup>         | 23       | 23       | -     |
| Veterans Integrated Service Network (%) |          |          |       |
| 1                                       | 4.4      | 4.0      | -2.0  |
| 2                                       | 1.5      | 1.2      | -2.6  |
| 3                                       | 1.4      | 2.0      | 4.9   |
| 4                                       | 4.1      | 3.6      | -2.6  |
| 5                                       | 0.8      | 1.4      | 5.7   |
| 6                                       | 6.3      | 7.2      | 3.6   |
| 7                                       | 8.3      | 7.7      | -2.2  |
| 8                                       | 5.6      | 8.9      | 12.5  |
| 9                                       | 3.5      | 9.1      | 23.2  |
| 10                                      | 2.7      | 4.3      | 8.7   |
| 11                                      | 4.9      | 5.3      | 2.0   |
| 12                                      | 2.7      | 3.6      | 4.9   |
| 15                                      | 5.5      | 4.5      | -4.5  |
| 16                                      | 11       | 8.9      | -6.5  |
| 17                                      | 8.2      | 5.8      | -9.6  |
| 18                                      | 3.7      | 4.2      | 2.6   |
| 19                                      | 4.2      | 3.1      | -5.8  |
| 20                                      | 6.3      | 4.0      | -10.8 |
| 21                                      | 4.1      | 2.7      | -7.9  |

|    |     |     |      |
|----|-----|-----|------|
| 22 | 5.0 | 4.4 | -3.3 |
| 23 | 6.0 | 4.3 | -7.7 |

<sup>a</sup>Reduced dose versus continued dose group difference in means or proportions expressed as a percentage of the pooled standard deviation or standard error for proportions. <sup>b</sup>Advanced practice nurse, physician's assistant, clinical pharmacist.

**Table S2. Differences in All Baseline Characteristics in Propensity Model Used to Match Subjects Whose Citalopram Dose Was or Wasn't Reduced to  $\leq$  40 mg/day.**

| Characteristic                   | Dose Not Reduced<br>n = 14,762 | Dose Decreased<br>n = 14,762 | Standardized Difference (%) <sup>a</sup> |
|----------------------------------|--------------------------------|------------------------------|------------------------------------------|
| <b>Patient Demographics</b>      |                                |                              |                                          |
| Age (yrs)                        | 58                             | 58                           | 6.0                                      |
| Male (%)                         | 92                             | 92                           | 1.3                                      |
| White race (%)                   | 84                             | 86                           | 4.6                                      |
| Hispanic (%)                     | 5.3                            | 5.1                          | -0.9                                     |
| Married (%)                      | 57                             | 58                           | 2.4                                      |
| VA eligibility by means test (%) | 21                             | 20                           | -1.7                                     |
| Other insurance (%)              | 54                             | 56                           | 3.6                                      |
| <b>VA health care</b>            |                                |                              |                                          |
| Hospitalization (%)              | 20                             | 18                           | -4.5                                     |
| Outpatient Visit Days            | 14                             | 14                           | -0.6                                     |
| Prescription classes             | 6.1                            | 6.2                          | 2.5                                      |
| Electrocardiogram (%)            | 23                             | 23                           | -0.2                                     |
| ICD placement or check (%)       | 0.2                            | 0.2                          | 0.5                                      |
| <b>Diagnoses recorded (%)</b>    |                                |                              |                                          |
| <b>Mental health</b>             |                                |                              |                                          |
| Depression                       | 71                             | 69                           | -3.2                                     |
| Post-traumatic stress disorder   | 53                             | 53                           | 0.4                                      |
| Suicidal behavior                | 0.1                            | 0.1                          | -0.7                                     |
| Anxiety                          | 25                             | 25                           | 0.4                                      |
| Psychosis                        | 14                             | 15                           | 1.4                                      |
| Substance abuse                  | 23                             | 22                           | -3.2                                     |
| Sleep disorder                   | 12                             | 11                           | -1.4                                     |
| Sleep apnea                      | 20                             | 19                           | -1.0                                     |
| <b>Cardiovascular</b>            |                                |                              |                                          |
| Tachycardia                      | 1.9                            | 1.7                          | -1.5                                     |
| Atrial fibrillation              | 3.4                            | 3.2                          | -1.5                                     |
| QT abnormality                   | 0.0004                         | 0.0003                       | -0.7                                     |
| Atrioventricular block           | 2.5                            | 2.4                          | -0.3                                     |
| Other arrhythmia                 | 3.7                            | 3.5                          | -0.8                                     |
| Hypertension                     | 59                             | 60                           | 1.1                                      |
| Ischemic heart disease           | 18                             | 18                           | 0.3                                      |
| Heart failure                    | 4.4                            | 4.2                          | -0.8                                     |
| Cardiac valve abnormality        | 2.2                            | 2.2                          | 0.1                                      |
| Peripheral artery disease        | 11                             | 12                           | 1.1                                      |
| <b>Other</b>                     |                                |                              |                                          |
| Diabetes mellitus                | 32                             | 32                           | -0.3                                     |
| Pulmonary disease                | 17                             | 17                           | -0.1                                     |
| Chronic kidney disease           | 5.1                            | 5.0                          | -0.6                                     |
| Hypothyroid                      | 7.0                            | 7.8                          | 2.8                                      |
| Liver disease                    | 6.4                            | 6.1                          | -1.2                                     |
| Seizure disorder                 | 3.6                            | 3.7                          | 0.7                                      |
| Malignant cancer                 | 0.5                            | 0.4                          | -2.1                                     |

|                                              |      |      |      |
|----------------------------------------------|------|------|------|
| Other cancer (excluding basal skin)          | 8.0  | 7.8  | -0.6 |
| <b>Prescriptions (%)</b>                     |      |      |      |
| <b>Mental health</b>                         |      |      |      |
| Other selective serotonin receptor inhibitor | 52   | 51   | -1.4 |
| Tricyclic antidepressant                     | 7.4  | 7.0  | -1.7 |
| Monoamine oxidase inhibitor                  | 0.00 | 0.00 | -0.7 |
| Sedative/hypnotic                            | 41   | 42   | 2.1  |
| Antipsychotic                                | 26   | 27   | 2.8  |
| Lithium                                      | 1.2  | 1.2  | 0.2  |
| Dementia                                     | 3.1  | 3.3  | 1.5  |
| <b>Cardiovascular</b>                        |      |      |      |
| Beta-adrenergic blocker                      | 33   | 34   | 0.3  |
| Beta-adrenergic stimulant                    | 0.4  | 0.4  | 0.1  |
| Alpha-adrenergic blocker                     | 28   | 29   | 1.2  |
| Angiotensin II antagonist                    | 38   | 39   | 0.6  |
| Calcium channel blocker                      | 21   | 22   | 0.5  |
| Nitrate                                      | 9.7  | 9.8  | 0.6  |
| Digoxin                                      | 1.3  | 1.2  | -1.3 |
| Antiplatelet agent                           | 25   | 26   | 3.2  |
| Anticoagulant                                | 5.0  | 4.7  | -1.6 |
| Other antihypertensive                       | 9.8  | 10   | 0.6  |
| Antiarrhythmic                               | 0.8  | 0.7  | -1.7 |
| Diuretic (potassium-sparing)                 | 4.5  | 4.6  | -0.2 |
| Diuretic (other)                             | 27   | 27   | 0.3  |
| Cholesterol reducer                          | 61   | 63   | 3.3  |
| Others that prolong QT interval              | 23   | 23   | -0.1 |
| <b>Other</b>                                 |      |      |      |
| Insulin                                      | 12   | 11   | -0.8 |
| Other glucose control                        | 24   | 24   | 0.5  |
| Thyroid hormone replacement                  | 9.0  | 9.4  | 1.2  |
| Bone loss                                    | 8.3  | 9.1  | 2.7  |
| Corticosteroid (systemic)                    | 9.3  | 8.9  | -1.2 |
| Testosterone replacement                     | 4.1  | 4.4  | 1.5  |
| Anticonvulsant                               | 43   | 44   | 1.0  |
| Migraine medication                          | 3.3  | 3.0  | -1.7 |
| Parkinson's disease                          | 4.0  | 4.2  | 1.1  |
| Nervous system                               | 5.6  | 6.0  | 1.5  |
| Muscle relaxant                              | 24   | 24   | -0.1 |
| Respiratory                                  | 26   | 26   | 0.8  |
| Nonsteroidal anti-inflammatory               | 39   | 39   | 0.3  |
| Gout                                         | 4.8  | 4.9  | 0.7  |
| Immunosuppressant                            | 0.9  | 0.9  | -0.2 |
| Antineoplastic agent                         | 1.4  | 1.5  | 0.4  |
| Cytochrome 2C19 enzyme inhibitor             | 46   | 47   | 1.4  |
| <b>Citalopram Prescriptions</b>              |      |      |      |
| Days supplied for > 40 mg/day                | 228  | 249  | 20   |
| Mean index dose over 40 mg/day               | 23   | 23   | -1.1 |

|                                                |     |     |      |
|------------------------------------------------|-----|-----|------|
| Last Month (%)                                 |     |     |      |
| May                                            | 10  | 12  | 9.1  |
| June                                           | 33  | 30  | -8.6 |
| July                                           | 57  | 58  | 2.3  |
| Last prescription supply 90 days (%)           | 53  | 54  | 2.0  |
| Mean carryover into follow-up (days)           | 13  | 13  | 0.3  |
| Refill (%)                                     | 59  | 62  | 6.7  |
| Mailed (%)                                     | 91  | 92  | 4.2  |
| Community-based outpatient clinic              | 42  | 42  | 0.2  |
| Prescriber Psychiatry (%)                      | 51  | 51  | 0.2  |
| VA Integrated Service Network (%) <sup>b</sup> |     |     |      |
| 1                                              | 4.1 | 4.7 | 2.8  |
| 2                                              | 1.3 | 1.4 | 0.9  |
| 3                                              | 1.6 | 1.6 | -0.4 |
| 4                                              | 4.1 | 4.2 | 0.4  |
| 5                                              | 1.0 | 1.0 | 0.2  |
| 6                                              | 7.2 | 6.4 | -3.2 |
| 7                                              | 8.6 | 8.8 | 0.8  |
| 8                                              | 6.6 | 6.6 | -0.2 |
| 9                                              | 4.1 | 3.9 | -0.8 |
| 10                                             | 3.1 | 3.2 | 0.1  |
| 11                                             | 5.3 | 5.6 | 1.6  |
| 12                                             | 3.1 | 3.2 | 0.7  |
| 15                                             | 5.1 | 5.4 | 1.0  |
| 16                                             | 11  | 10  | -0.8 |
| 17                                             | 7.1 | 7.0 | -0.3 |
| 18                                             | 3.8 | 4.6 | 3.9  |
| 19                                             | 4.0 | 3.7 | -5.8 |
| 20                                             | 5.2 | 4.9 | -1.4 |
| 21                                             | 3.3 | 3.3 | 0.3  |
| 22                                             | 5.2 | 5.0 | -3.3 |
| 23                                             | 5.5 | 5.2 | -1.3 |

<sup>a</sup>Standardized differences of  $\leq 10\%$  are unlikely to lead to differences in outcome when baseline variables are not strongly related to a study outcome. ICD – internal cardiac defibrillator.

<sup>b</sup>Geographical organization of VA health care systems.

**Figure S1. Density Distributions of Propensity Scores for Citalopram Dose Reductions.**

The distribution of the propensity scores estimated by Cox regression of times to citalopram dose reductions in relation to all baseline characteristics listed in Table ST2 was higher in subjects whose dose was reduced to  $\leq 40$  mg/day, but overlapped extensively with the distribution of propensity scores in the group whose doses were not reduced to  $\leq 40$  mg/day. One-to-one matching selected the nearest neighbor from these distributions.

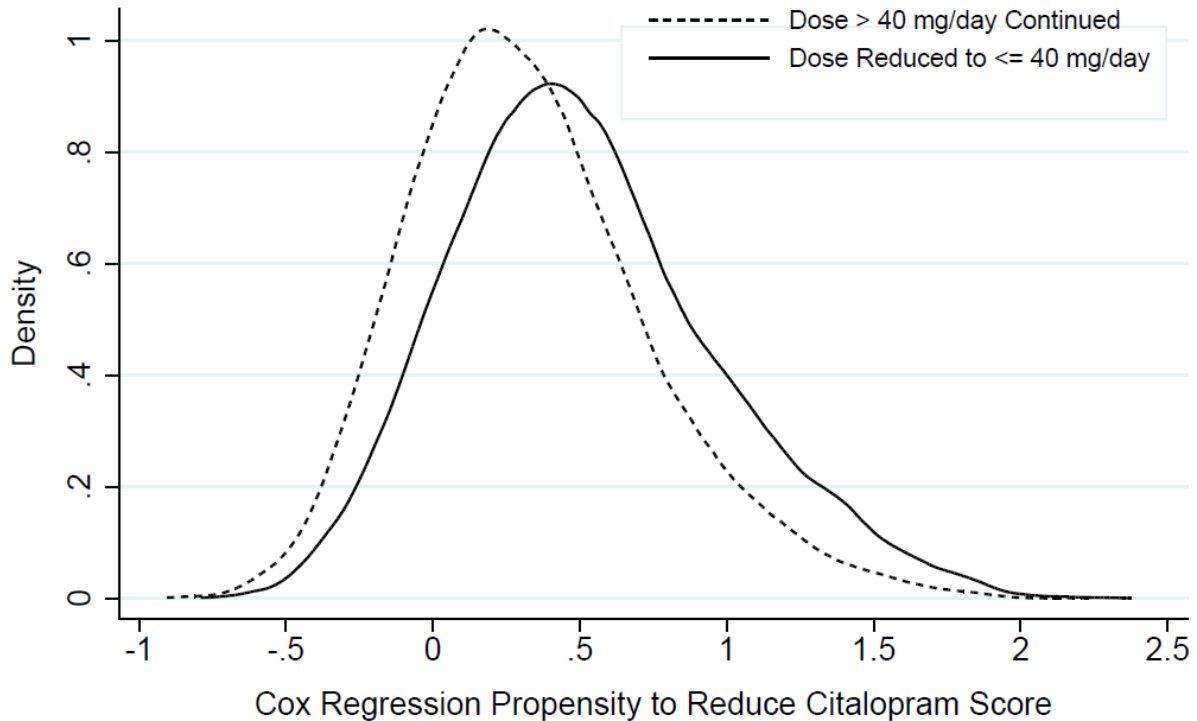

Citalopram prescriptions from specific Veterans Integrated Service Networks, VA community-based outpatient clinics or psychiatrists were independently associated with shorter times to dose reductions in the propensity model as were the presence of a diagnosis of depression, post-traumatic stress disorder, psychosis or anxiety along with corresponding medication classes. Patients that were older and those with ischemic heart disease, hypothyroidism, or an internal cardiac defibrillator also were more likely to have a dose reduction. Higher baseline citalopram doses and number of days  $> 40$  mg/day during the baseline year decreased the likelihood of a prescription for  $\leq 40$ mg/day.
